# Supplementary material for: Bioinformatics analysis and validation of CD44 and associated biomarkers in prostate cancer
Source: Research Square preprint supplement (doi:10.21203/rs.3.rs-7019627/v1), 2025-07-11
Supplement: Supplementary file 1 [file 6b886bc0f0740dd873402042.pdf]

## **Supplementary Information**

**Supplementary Table S1** Primer sequence.

**Supplementary Table S2** Results of molecular docking of compounds and genes related to CD44, PLA2G4D and SERPINB5.
