# Supplementary material for: Bioinformatics analysis and validation of CD44 and associated biomarkers in prostate cancer
Source: Research Square preprint supplement (doi:10.21203/rs.3.rs-7019627/v1), 2025-07-11
Supplement: Supplementary file 1 [file 57e0f783a870058ee5db299c.xlsx]

## Sheet: 01.drugs_result
Supplementary Table 2 Results of molecular docking of compounds and genes related to CD44, PLA2G4D and SERPINB5
Term	P.value	Adjusted.P.value	Old.P.value	Old.Adjusted.P.value	Odds.Ratio	Combined.Score	Genes
Tetradioxin CTD 00006848	0.00668277432951905	0.0499523604455104	0	0	48696	243880.381378455	PLA2G4D;CD44;SERPINB5
estradiol CTD 00005920	0.010184461838405	0.0499523604455104	0	0	46992	215547.232122611	PLA2G4D;CD44;SERPINB5
formoterol CTD 00000665	0.00314680082428191	0.0499523604455104	0	0	499.425	2877.37168963486	CD44
etodolac CTD 00007163	0.00314680082428191	0.0499523604455104	0	0	499.425	2877.37168963486	CD44
corbadrine PC3 UP	0.00344615305630759	0.0499523604455104	0	0	453.977272727273	2574.27663877793	SERPINB5
doxazosin CTD 00007158	0.00359580673873441	0.0499523604455104	0	0	434.217391304348	2443.76979314669	SERPINB5
salbutamol PC3 UP	0.0037454454654532	0.0499523604455104	0	0	416.104166666667	2324.86332492857	SERPINB5
isoetarine PC3 UP	0.00389506923436901	0.0499523604455104	0	0	399.44	2216.11062530876	SERPINB5
hmba CTD 00000732	0.00389506923436901	0.0499523604455104	0	0	399.44	2216.11062530876	CD44
Bisulfite BOSS	0.000290638791896761	0.0499523604455104	0	0	202.051020408163	1645.38820509358	CD44;SERPINB5
terbutaline PC3 UP	0.00509152090098156	0.0499523604455104	0	0	302.484848484848	1597.17405140703	SERPINB5
etoposide MCF7 UP	0.00509152090098156	0.0499523604455104	0	0	302.484848484848	1597.17405140703	SERPINB5
ritodrine PC3 UP	0.00524101004609641	0.0499523604455104	0	0	293.573529411765	1541.62536659043	SERPINB5
Luronit CTD 00006106	0.00539048423315445	0.0499523604455104	0	0	285.171428571429	1489.48460880267	CD44
Beryllium sulfate CTD 00001005	0.00568938773289464	0.0499523604455104	0	0	269.72972972973	1394.2741447062	CD44
tacrine HL60 UP	0.0059882314019792	0.0499523604455104	0	0	255.871794871795	1309.5413986235	CD44
Salbutamol CTD 00005336	0.00613763080051258	0.0499523604455104	0	0	249.463	1270.59146099404	CD44
CHLOROGENIC ACID CTD 00005640	0.00613763080051258	0.0499523604455104	0	0	249.463	1270.59146099404	CD44
Aziridine BOSS	0.00628701524151983	0.0499523604455104	0	0	243.365853658537	1233.6869399593	CD44
clenbuterol PC3 UP	0.00628701524151983	0.0499523604455104	0	0	243.365853658537	1233.6869399593	SERPINB5
fenoterol PC3 UP	0.00673507883011605	0.0499523604455104	0	0	226.738636363636	1133.78971911263	SERPINB5
pomiferin CTD 00004186	0.00688440344825683	0.0499523604455104	0	0	221.688888888889	1103.67742297314	CD44
Crizotinib CTD 00004714	0.00703371311091952	0.0499523604455104	0	0	216.858695652174	1074.97734402388	CD44
alpha-Neu5Ac BOSS	0.00703371311091952	0.0499523604455104	0	0	216.858695652174	1074.97734402388	CD44
T-2 TOXIN CTD 00006824	0.00703371311091952	0.0499523604455104	0	0	216.858695652174	1074.97734402388	CD44
Osajin CTD 00004306	0.00733228757304079	0.0499523604455104	0	0	207.802083333333	1021.44443446465	CD44
(-)-isoprenaline PC3 UP	0.0077800371147531	0.0499523604455104	0	0	195.549019607843	949.624009021504	SERPINB5
3,3',4,4'-Tetrachlorobiphenyl CTD 00001342	0.008078462047278	0.0499523604455104	0	0	188.150943396226	906.615436737158	CD44
Tanespimycin CTD 00003582	0.00822765208709083	0.0499523604455104	0	0	184.657407407407	886.402567873523	SERPINB5
DEOXYCHOLIC ACID CTD 00005765	0.00912247837612096	0.0499523604455104	0	0	166.141666666667	780.369694450321	SERPINB5
orciprenaline PC3 UP	0.00942063422116617	0.0499523604455104	0	0	160.766129032258	749.950337703132	SERPINB5
Orphenadrine hydrochloride BOSS	0.00956968972447913	0.0499523604455104	0	0	158.206349206349	735.525759665316	CD44
QUINOLINE CTD 00001749	0.00956968972447913	0.0499523604455104	0	0	158.206349206349	735.525759665316	SERPINB5
DL-Mevalonic acid CTD 00006329	0.00971873028148459	0.0499523604455104	0	0	155.727	721.590219143659	CD44
VANADIUM PENTOXIDE CTD 00002655	0.00971873028148459	0.0499523604455104	0	0	155.727	721.590219143659	CD44
FITC BOSS	0.0100167665600723	0.0499523604455104	0	0	150.992424242424	695.092860072288	CD44
beclomethasone CTD 00005468	0.0100167665600723	0.0499523604455104	0	0	150.992424242424	695.092860072288	CD44
5-azacytidine BOSS	0.0101657622834468	0.0499523604455104	0	0	148.731343283582	682.48795362197	CD44
Methaneseleninic acid CTD 00000412	0.00119292665470886	0.0499523604455104	0	0	97.985	659.570900327199	CD44;SERPINB5
TBTO CTD 00000264	0.0107615957524882	0.0515555517444781	0	0	140.323943661972	635.916038987997	CD44
lamivudine CTD 00007258	0.0110594228380556	0.0517782069236241	0	0	136.465753424658	614.706229245501	CD44
Bathocuproine disulfonate CTD 00001350	0.0119525455699437	0.0523877529235829	0	0	126.063291139241	558.058364527147	CD44
mitomycin C BOSS	0.0119525455699437	0.0523877529235829	0	0	126.063291139241	558.058364527147	CD44
Isoflavone BOSS	0.0126964037761181	0.0532426359017676	0	0	118.529761904762	517.552677869987	CD44
Vincristine sulfate BOSS	0.012845130618796	0.0532426359017676	0	0	117.129411764706	510.074047237415	CD44
microcystin RR CTD 00002594	0.0131425395073887	0.0532426359017676	0	0	114.425287356322	495.679018920707	SERPINB5
Chlorophenothane CTD 00005755	0.0134398886742326	0.0532426359017676	0	0	111.842696629213	481.989258117309	SERPINB5
Heparitin BOSS	0.0134398886742326	0.0532426359017676	0	0	111.842696629213	481.989258117309	CD44
curcumin CTD 00000663	0.00205038992761665	0.0499523604455104	0	0	74.0342205323194	458.251487548618	CD44;SERPINB5
UNII-768N7QO4KH BOSS	0.0141830003471833	0.0551263787079199	0	0	105.867021276596	450.53946711898	CD44
lovastatin CTD 00006225	0.0144801405312483	0.055219402460005	0	0	103.651041666667	438.959796854159	CD44
33258 Hoechst BOSS	0.0147772210176025	0.055219402460005	0	0	101.525510204082	427.896360088283	CD44
aspirin CTD 00005447	0.00231236580472598	0.0499523604455104	0	0	69.5456171735241	422.106019095529	CD44;SERPINB5
ionomycin CTD 00007090	0.0167067894603528	0.055219402460005	0	0	89.5765765765766	366.541984609772	CD44
Healon BOSS	0.0171517164979722	0.055219402460005	0	0	87.2061403508772	354.55025696917	CD44
ETHYLENE GLYCOL BOSS	0.0172999956867377	0.055219402460005	0	0	86.4434782608696	350.705429351464	CD44
acetaldehyde BOSS	0.0174482599647785	0.055219402460005	0	0	85.6939655172414	346.933334866714	CD44
Ethylene dimethacrylate BOSS	0.0175965093316657	0.055219402460005	0	0	84.957264957265	343.232000141587	CD44
INDOMETHACIN SODIUM BOSS	0.0177447437885406	0.055219402460005	0	0	84.2330508474576	339.599521408298	CD44
Nandrolone phenpropionate BOSS	0.0177447437885406	0.055219402460005	0	0	84.2330508474576	339.599521408298	CD44
lorazepam BOSS	0.0192262684961311	0.055219402460005	0	0	77.6133	306.68715661621	CD44
methazolamide HL60 DOWN	0.0195223945937551	0.055219402460005	0	0	76.4115384615385	300.770565230774	CD44
9001-31-4 BOSS	0.0201144679925479	0.055219402460005	0	0	74.115671641791	289.519228220732	CD44
retinol BOSS	0.0201144679925479	0.055219402460005	0	0	74.115671641791	289.519228220732	CD44
docetaxel BOSS	0.021150022923213	0.055219402460005	0	0	70.4113475177305	271.514203316674	CD44
genistein BOSS	0.0212978997651538	0.055219402460005	0	0	69.9119718309859	269.101443612951	CD44
Deacetylchitin BOSS	0.0212978997651538	0.055219402460005	0	0	69.9119718309859	269.101443612951	CD44
Decitabine BOSS	0.0214457617145024	0.055219402460005	0	0	69.4195804195804	266.725872449709	CD44
fulvestrant PC3 DOWN	0.0217414409450392	0.055219402460005	0	0	68.4551724137931	262.083031640473	CD44
thioridazine MCF7 UP	0.0230712605438279	0.055219402460005	0	0	64.4253246753247	242.829844345449	CD44
N-NITROSODIETHYLAMINE CTD 00005817	0.0233666122801722	0.055219402460005	0	0	63.5929487179487	238.883547864301	CD44
ARSENIC CTD 00005442	0.00529622997360218	0.0499523604455104	0	0	44.9964747356052	235.815726612465	CD44;SERPINB5
Pyrrolidine dithiocarbamate CTD 00001021	0.0236619044917088	0.055219402460005	0	0	62.7816455696203	235.047507824918	CD44
epivincamine HL60 DOWN	0.0238095282738951	0.055219402460005	0	0	62.3836477987421	233.169453357892	CD44
GLYCOGEN BOSS	0.0248424781883714	0.055219402460005	0	0	59.7319277108434	220.72143485852	CD44
5109870 MCF7 UP	0.0254324080368406	0.055219402460005	0	0	58.3147058823529	214.116	SERPINB5
O,P'-DDT CTD 00000838	0.0264642127545926	0.055219402460005	0	0	55.9887005649718	203.348828445737	SERPINB5
GEMCITABINE HYDROCHLORIDE BOSS	0.0266115539598137	0.055219402460005	0	0	55.6713483146067	201.887123002069	CD44
dUTP BOSS	0.0266115539598137	0.055219402460005	0	0	55.6713483146067	201.887123002069	CD44
digoxin PC3 DOWN	0.026758880297526	0.055219402460005	0	0	55.3575418994413	200.443508274877	CD44
maltotriose BOSS	0.0270534883841025	0.055219402460005	0	0	54.7403314917127	197.609275118901	CD44
PROPIDIUM BOSS	0.0270534883841025	0.055219402460005	0	0	54.7403314917127	197.609275118901	CD44
Velcade(Bortezomib) BOSS	0.0272007701284628	0.055219402460005	0	0	54.4368131868132	196.218037093606	CD44
17-Hydroxyandrostan-3-one CTD 00006776	0.0277897485032958	0.055219402460005	0	0	53.255376344086	190.818704449636	CD44
Imatinib mesylate BOSS	0.0277897485032958	0.055219402460005	0	0	53.255376344086	190.818704449636	CD44
Erythorbic acid BOSS	0.0277897485032958	0.055219402460005	0	0	53.255376344086	190.818704449636	CD44
GLYCOPROTEIN BOSS	0.0280841485296891	0.055219402460005	0	0	52.6835106382979	188.214474407015	CD44
NICKEL CTD 00006389	0.0280841485296891	0.055219402460005	0	0	52.6835106382979	188.214474407015	CD44
metformin BOSS	0.0280841485296891	0.055219402460005	0	0	52.6835106382979	188.214474407015	CD44
AGN-PC-0JHFVD BOSS	0.0283784891248538	0.055219402460005	0	0	52.1236842105263	185.671018467041	CD44
formaldehyde BOSS	0.0283784891248538	0.055219402460005	0	0	52.1236842105263	185.671018467041	CD44
Phetharbital BOSS	0.0285256371360253	0.055219402460005	0	0	51.848167539267	184.421445684106	CD44
PLATINUM BOSS	0.0288198885972929	0.055219402460005	0	0	51.3056994818653	181.965388407014	CD44
Aizen uranine BOSS	0.0288198885972929	0.055219402460005	0	0	51.3056994818653	181.965388407014	CD44
furosemide BOSS	0.0288198885972929	0.055219402460005	0	0	51.3056994818653	181.965388407014	CD44
Dinoprostone BOSS	0.0291140806361968	0.055219402460005	0	0	50.774358974359	179.565213897234	CD44
2-Butanone BOSS	0.0291140806361968	0.055219402460005	0	0	50.774358974359	179.565213897234	CD44
water BOSS	0.0291140806361968	0.055219402460005	0	0	50.774358974359	179.565213897234	CD44
5-Fluorouracil BOSS	0.0292611543756679	0.055219402460005	0	0	50.5127551020408	178.385513378823	CD44
LAMININ BOSS	0.0292611543756679	0.055219402460005	0	0	50.5127551020408	178.385513378823	CD44
tamoxifen BOSS	0.0292611543756679	0.055219402460005	0	0	50.5127551020408	178.385513378823	CD44
Acid red 87 BOSS	0.0294082132651383	0.055219402460005	0	0	50.253807106599	177.219110054989	CD44
cyclophosphamide BOSS	0.0294082132651383	0.055219402460005	0	0	50.253807106599	177.219110054989	CD44
doxorubicin BOSS	0.0297022864925554	0.055219402460005	0	0	49.7437185929648	174.925340916176	CD44
cephaeline MCF7 DOWN	0.0298493008283308	0.055219402460005	0	0	49.4925	173.797559227623	CD44
dexamethasone BOSS	0.0299963003154061	0.055219402460005	0	0	49.2437810945274	172.682242747347	CD44
Vitamin D3 BOSS	0.0301432849570314	0.055219402460005	0	0	48.9975247524753	171.579194182258	CD44
0179445-0000 MCF7 UP	0.0302902547474785	0.055219402460005	0	0	48.7536945812808	170.488220319462	SERPINB5
temozolomide CTD 00002088	0.0302902547474785	0.055219402460005	0	0	48.7536945812808	170.488220319462	CD44
progesterone BOSS	0.0327864702351748	0.058745269912448	0	0	44.9477272727273	153.61961581194	CD44
camptothecin MCF7 UP	0.0329331728968102	0.058745269912448	0	0	44.7420814479638	152.717020647812	SERPINB5
EINECS 250-892-2 CTD 00001193	0.0330798607273979	0.058745269912448	0	0	44.5382882882883	151.823480835452	SERPINB5
PHENCYCLIDINE CTD 00005881	0.0335198352152787	0.0590178295243368	0	0	43.9377777777778	149.196	CD44
LITHIUM CHLORIDE CTD 00007226	0.0342528294224071	0.0593126060159226	0	0	42.9717391304348	144.986050811671	CD44
Retinoic acid BOSS	0.0343993837807734	0.0593126060159226	0	0	42.7835497835498	144.168439115321	CD44
cephaeline PC3 DOWN	0.0346924480209846	0.0593126060159226	0	0	42.412017167382	142.556682387331	CD44
verteporfin MCF7 DOWN	0.0348389579025565	0.0593126060159226	0	0	42.2286324786325	141.762323196096	CD44
dorzolamide HL60 DOWN	0.0352783986095116	0.0595684435537655	0	0	41.6877637130802	139.424077066813	CD44
emetine MCF7 DOWN	0.0361568798520293	0.0605554247928296	0	0	40.6460905349794	134.940469614618	CD44
Bisphenol A CTD 00000312	0.0114344853806615	0.0523445330759169	0	0	29.7412698412698	132.976829727811	CD44;SERPINB5
HEMATOXYLIN BOSS	0.0371811004638157	0.0617686023834358	0	0	39.494	130.012458876507	CD44
cantharidin HL60 DOWN	0.0376198299550027	0.0619974797658444	0	0	39.0197628458498	127.993561593126	CD44
curcumin BOSS	0.0380584261648899	0.0622225062695819	0	0	38.5566	126.027499024501	CD44
rifabutin MCF7 UP	0.039519451132547	0.0641024167976747	0	0	37.0883458646617	119.83104705578	SERPINB5
2-Nonenal, 4-hydroxy-, (2E,4R)- CTD 00001295	0.0405412879573458	0.0652461353063534	0	0	36.1245421245421	115.794848869617	SERPINB5
Allococaine CTD 00005697	0.0428741931259888	0.0684657657670829	0	0	34.0968858131488	107.387636992243	CD44
simvastatin CTD 00007319	0.0449123806028708	0.0710830736628907	0	0	32.4983498349835	100.843737481006	CD44
podophyllotoxin HL60 UP	0.0452033138341684	0.0710830736628907	0	0	32.2819672131148	99.9638515660794	CD44
resveratrol CTD 00002483	0.0181886561436079	0.055219402460005	0	0	23.0118824265166	92.2076272389636	CD44;SERPINB5
thapsigargin PC3 DOWN	0.0485448007868125	0.0751826418322772	0	0	29.9832317073171	90.7073168131953	CD44
HC toxin MCF7 UP	0.0489800713142531	0.0751826418322772	0	0	29.7069486404834	89.6063100872626	SERPINB5
menadione HL60 UP	0.0492701778997933	0.0751826418322772	0	0	29.5255255255255	88.8847135741626	CD44
Decitabine CTD 00000750	0.0228317538447415	0.055219402460005	0	0	20.2436040044494	76.5127864150488	CD44;SERPINB5
progesterone CTD 00006624	0.0257378195637744	0.055219402460005	0	0	18.9064296915839	69.1936339845419	CD44;SERPINB5
hydrogen peroxide CTD 00006118	0.0487993914868192	0.0751826418322772	0	0	12.9734181954324	39.1802086196278	CD44;SERPINB5
