# Supplementary material for: Bioinformatics analysis and validation of CD44 and associated biomarkers in prostate cancer
Source: Research Square preprint supplement (doi:10.21203/rs.3.rs-7019627/v1), 2025-07-11
Supplement: Supplementary file 2 [file cb85eb197a4634d2edfacf1c.xlsx]

## Sheet: Sheet1
Supplementary Table 1 Primer sequence
引物	序列
CD44 F	GCACAGACAGAATCCCTGCT
CD44 R	TCTTGCCTCTTGGTTGCTGT
PLA2G4D F	ACTACAACGTGCAGACCAGC
PLA2G4D R	AGATCAGGTTATGCCCGCAG
SERPINB5 F	ATGGATGCCCTGCAACTAGC
SERPINB5 R	ATTGCCCAGTGGCTCCTTTT
GAPDH F	ATGGGCAGCCGTTAGGAAAG
GAPDH R	AGGAAAAGCATCACCCGGAG
The reaction program was set as follows: 1 minute at 95 °C, followed by 40 cycles of 20 seconds at 95 °C and 20 seconds at 55 °C, and then 30 seconds at 72 °C.
